## FORMAL COMMENT

## Onchocerciasis-associated epilepsy and biomarkers

Robert Colebunders<sup>1\*</sup>, Amber Hadermann<sup>1</sup>, Alfred K. Njamnshi<sup>2,3</sup>, Bruno P. Mmbando<sup>4</sup>, Olivia Kamoen<sup>5</sup>, Joseph Nelson Siewe Fodjo<sup>1,2</sup>

**1** Global Health Institute, University of Antwerp, Antwerp, Belgium, **2** Brain Research Africa Initiative (BRAIN), Yaoundé, Cameroon, **3** Neuroscience Lab, Faculty of Medicine & Biomedical Sciences, The University of Yaoundé I, Yaoundé, Cameroon, **4** National Institute for medical Research, Tanga Research Centre, Tanga, Tanzania, **5** Department of Neurology, Heilig Hart Ziekenhuis, Lier, Belgium

\* [robert.colebunders@uantwerpen.be](mailto:robert.colebunders@uantwerpen.be)

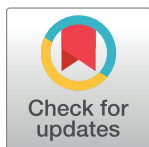

## OPEN ACCESS

**Citation:** Colebunders R, Hadermann A, Njamnshi AK, Mmbando BP, Kamoen O, Siewe Fodjo JN (2024) Onchocerciasis-associated epilepsy and biomarkers. PLoS Negl Trop Dis 18(5): e0011808. <https://doi.org/10.1371/journal.pntd.0011808>

**Editor:** Jennifer A. Downs, Weill Cornell Medical College, UNITED STATES

**Received:** August 14, 2023

**Accepted:** November 20, 2023

**Published:** May 9, 2024

**Copyright:** © 2024 Colebunders et al. This is an open access article distributed under the terms of the [Creative Commons Attribution License](https://creativecommons.org/licenses/by/4.0/), which permits unrestricted use, distribution, and reproduction in any medium, provided the original author and source are credited.

**Funding:** Funding RC and JNSF received funding from the Research Foundation – Flanders (FWO), grant numbers GOA0522N and 1296723N respectively. The funders had no role in study design, data collection and analysis, decision to publish, or preparation of the manuscript.

**Competing interests:** The authors have declared that no competing interests exist.

There is increasing international recognition that onchocerciasis-associated epilepsy (OAE) is an important public health problem in onchocerciasis-endemic areas where onchocerciasis elimination programmes were either absent or functioning sub-optimally [1]. In several recent population-based studies, it was shown that OAE (which includes the nodding syndrome (NS)) is preventable by strengthening onchocerciasis elimination efforts [2–5]. However, the pathogenesis of OAE remains to be elucidated [6].

So far, little was known about the immunological processes associated with OAE. In a recent PNTD paper, Arndts et al. [7] describe the immune profile (cytokine, chemokine, and immunoglobulin levels) of persons with epilepsy including NS that were examined at the Mahenge epilepsy clinic in Tanzania between November 2014 and April 2015. Profiles of persons with epilepsy were compared with profiles of individuals without neurological disorders residing in the same endemic area. In all study participants, skin snips were collected and tested for *Onchocerca volvulus* presence using PCR. Study participants were classified into three groups: Persons with epilepsy (including NS)-*O. volvulus* PCR-negative, persons with epilepsy (including NS)-*O. volvulus* PCR-positive, and controls without neurological disorders-*O. volvulus* PCR-negative. Cytokines, most chemokines, and three neurodegeneration markers were comparable between *O. volvulus* infected and uninfected participants with epilepsy. However, elevated eosinophil percentages with increased eosinophilic cationic protein (ECP) and antigen-specific IgG levels were observed within the *O. volvulus*-positive epilepsy/NS group. In addition, the highest levels of the *O. volvulus*-related metabolic product (NATOG) were found in *O. volvulus*-positive NS persons.

We applaud the efforts of Arndts and collaborators to investigate an extensive panel of immunological markers in persons with epilepsy including NS. However, we recommend caution in drawing conclusions from their findings, since their study lacked a crucial group for comparison: onchocerciasis-infected individuals without any epileptic disorder. Moreover, they should have categorised the epilepsy/NS group into persons with OAE including NS and persons with other types of epilepsy to investigate whether they can be distinguished based on immune profile.

Mahenge area is an onchocerciasis-endemic area with a high prevalence of epilepsy, up to 3.5% in certain rural villages (8) with a high proportion of them (77.9%) meeting the criteria for OAE (9). In 2014–15, when the samples were collected at the Mahenge epilepsy clinic, most rural villages had no health facilities nor a constant supply of anti-seizure medication. Therefore, in order to obtain anti-seizure medication persons with epilepsy had to attend the

Mahenge epilepsy clinic. In onchocerciasis-endemic areas with high *O. volvulus* transmission children first become *O. volvulus* infected and later develop epilepsy. This was shown in two cohort studies in Cameroon where a temporal and microfilaria dose-dependent association was observed between the level of *O. volvulus* infection in early childhood and the development of epilepsy later in life [8, 9]. The majority of participants in the *O. volvulus* PCR-negative epilepsy/NS group attending the Mahenge epilepsy clinic probably were persons with OAE who: (1) had been *O. volvulus* infected as young children; (2) developed epilepsy around the age of 8–12 years (the median age of the first seizures of persons with OAE) [10, 11] and (3) became *O. volvulus* PCR-negative due to prior ivermectin intake. In retrospect, indeed 37 (88%) of the 42 *O. volvulus* PCR-negative persons with epilepsy, for whom information was available, had taken ivermectin in the last five years.

The study findings of Arndts and collaborators suggest that most persons attending the Mahenge clinic presented a same type of epilepsy associated with onchocerciasis (OAE). Indeed, even persons with epilepsy who were PCR-negative presented with an *O. volvulus* immunological profile similar to PCR-positive persons with epilepsy. However, no OAE criteria were collected/presented, nor *O. volvulus* antibody testing was performed. Previous studies have shown that NATOG levels are increased in *O. volvulus* infected persons and that these levels correlate with the individual parasitic load [12]. The fact that the highest levels of NATOG were observed among *O. volvulus*-positive persons with NS was expected as NS is associated with a higher *O. volvulus* microfilarial load than other forms of OAE [11]. While determining NATOG levels may be useful in persons with epilepsy in high *O. volvulus* transmission zones, the NATOG test will have low discriminating power to differentiate between NS and other forms of epilepsy because most other forms of epilepsy in such areas will be OAE. In no or low *O. volvulus* transmission zones, there is no need for NATOG testing because NS is unlikely to occur. The elevated eosinophil percentages in the *O. volvulus* positive epilepsy/NS patients were also expected because increased eosinophil levels are associated with *O. volvulus* infection. There is currently overwhelming epidemiological evidence for the association between NS and *O. volvulus* infection [6]. In a recently conducted clinical trial in Uganda investigating the effect of doxycycline in persons with NS, 232 (96.7%) of the 240 persons with NS were found to present *O. volvulus* antibodies [13]. Considering the relatively low sensitivity of *O. volvulus* antibody testing, it is very likely that all persons with NS have previously been infected with *O. volvulus*.

The authors concluded that the biomarkers they identified might be useful for a differential diagnosis of epilepsy and nodding syndrome in *O. volvulus*-endemic areas. We disagree with this statement. While increased knowledge about neurodegenerative biomarkers and the patients' immune profile may be of interest for the pathogenesis of OAE, these biological parameters do not seem to be useful to discriminate between OAE and other forms of epilepsy in onchocerciasis-endemic regions. Furthermore, the procedures to determine these biological parameters are complicated and difficult to implement as routine clinical or field research practice.

What is crucially important at the moment is a simple diagnostic approach or tool to differentiate OAE from other forms of epilepsy. Currently this is achieved by using the proposed OAE definition [14] which requires (1) good clinical history taking, (2) using epidemiological arguments, and (3) point-of-care onchocerciasis tests like the OV16 rapid diagnostic tests (or skin snip testing when possible). One major problem in overlapping *Taenia solium*- and onchocerciasis-endemic regions is to differentiate OAE from epilepsy caused by neurocysticercosis (NCC). The latter generally appears at an older age than OAE (beyond the age of 20 years) [15], though it would be useful to have a biomarker to precisely identify cases with epilepsy caused by NCC. Hereof, it has been suggested that individuals with a strong serologic

response to *Taenia solium*, as evidenced by the appearance of four bands during the enzyme-linked immunoelectrotransfer blot (EITB) test, are likely to develop NCC-related epilepsy [16]. However, this approach is still unfeasible for resource-limited onchocerciasis-endemic settings.

On the other hand, more research needs to be conducted to identify the pathogenesis of OAE in order to enhance the specificity of potential diagnostic tools. To do so, we need to learn more about the biology of the *O. volvulus* worm and its vector, *Simulium*. A series of omics studies have recently been initiated including proteomics and viral metagenomics of the worm [6]. Such studies could potentially reveal specific biomarkers to differentiate OAE from other forms of epilepsy and from *O. volvulus* infection without neurological involvement.

During the sixth meeting of the WHO Onchocerciasis Technical Advisory Subgroup in December 2022, it was stated that there was convincing evidence for the association between onchocerciasis and epilepsy [1]. It was also proposed that WHO should organise a meeting involving neurologists, the WHO seizure and epilepsy group and onchocerciasis specialists to formalize recommendations for programmes regarding OAE [1]. In 2022, WHO also adopted the Intersectoral Global Action Plan (IGAP) for epilepsy and other neurological disorders [17]. In this plan the importance of infectious disease control for prevention of epilepsy is highlighted but onchocerciasis is not mentioned. Establishing an internationally accepted case definition of OAE would be useful for epidemiological studies, for programmatic purposes relating to brain health in highly endemic onchocerciasis foci, for monitoring/evaluating onchocerciasis national elimination programmes and for determining the true burden of disease caused by onchocerciasis.

## Author Contributions

**Conceptualization:** Robert Colebunders, Amber Hadermann, Alfred K. Njamnshi, Bruno P. Mmbando, Olivia Kamoen, Joseph Nelson Siewe Fodjo.

**Funding acquisition:** Robert Colebunders, Joseph Nelson Siewe Fodjo.

**Writing – original draft:** Robert Colebunders, Joseph Nelson Siewe Fodjo.

**Writing – review & editing:** Robert Colebunders, Amber Hadermann, Alfred K. Njamnshi, Bruno P. Mmbando, Olivia Kamoen, Joseph Nelson Siewe Fodjo.

## References

1. World Health Organisation. Report of the sixth meeting of the WHO Onchocerciasis Technical Advisory Subgroup: virtual meeting, 19–21 December 2022. 2022. Available at <https://www.who.int/publications/item/9789240071469> Accessed 8 November 2023
2. Bhwana D, Amaral LJ, Mhina A, Matine P, Francis F, Siewe Fodjo JN, et al. Impact of a bi-annual community-directed treatment with ivermectin programme on the incidence of epilepsy in an onchocerciasis-endemic area of Mahenge, Tanzania: A population-based prospective study. *PLoS Negl Trop Dis*. 2023; 17(6):e0011178. Epub 20230628. <https://doi.org/10.1371/journal.pntd.0011178> PMID: 37379350.
3. Gumisiriza N, Kaiser C, Asaba G, Onen H, Mubiru F, Kitembo D, et al. Changes in epilepsy burden after onchocerciasis elimination in a hyperendemic focus of western Uganda: a comparison of two population-based, cross-sectional studies. *Lancet Infect Dis*. 2020; 20(11):1315–23. Epub 2020/07/01. [https://doi.org/10.1016/S1473-3099\(20\)30122-5](https://doi.org/10.1016/S1473-3099(20)30122-5) PMID: 32598869.
4. Gumisiriza N, Mubiru F, Siewe Fodjo JN, Mbonye Kayitale M, Hotterbeekx A, Idro R, et al. Prevalence and incidence of nodding syndrome and other forms of epilepsy in onchocerciasis-endemic areas in northern Uganda after the implementation of onchocerciasis control measures. *Infect Dis Poverty*. 2020; 9(1):12. Epub 2020/03/03. <https://doi.org/10.1186/s40249-020-0628-3> PMID: 32114979; PubMed Central PMCID: PMC7050130.

5. Jada SR, Amaral LJ, Lakwo T, Carter JY, Rovarini J, Bol YY, et al. Effect of onchocerciasis elimination measures on the incidence of epilepsy in Maridi, South Sudan: a 3-year longitudinal, prospective, population-based study. *Lancet Glob Health*. 2023; 11(8):e1260–e8. [https://doi.org/10.1016/S2214-109X\(23\)00248-6](https://doi.org/10.1016/S2214-109X(23)00248-6) PMID: 37474232.
6. Hadermann A, Amaral LJ, Van Cutsem G, Siewe Fodjo JN, Colebunders R. Onchocerciasis-associated epilepsy: an update and future perspectives. *Trends Parasitol*. 2023; 39(2):126–38. Epub 20221215. <https://doi.org/10.1016/j.pt.2022.11.010> PMID: 36528471.
7. Arndts K, Kegele J, Massarani AS, Ritter M, Wagner T, Pfarr K, et al. Epilepsy and nodding syndrome in association with an *Onchocerca volvulus* infection drive distinct immune profile patterns. *PLoS Negl Trop Dis*. 2023; 17(8):e0011503. Epub 20230803. <https://doi.org/10.1371/journal.pntd.0011503> PMID: 37535695.
8. Chesnais CB, Nana-Djeunga HC, Njamnshi AK, Lenou-Nanga CG, Boule C, Bissek AZ, et al. The temporal relationship between onchocerciasis and epilepsy: a population-based cohort study. *Lancet Infect Dis*. 2018; 18(11):1278–86. Epub 2018/10/01. [https://doi.org/10.1016/S1473-3099\(18\)30425-0](https://doi.org/10.1016/S1473-3099(18)30425-0) PMID: 30268645.
9. Chesnais CB, Bizet C, Campillo JT, Njamnshi WY, Bopda J, Nwane P, et al. A Second Population-Based Cohort Study in Cameroon Confirms the Temporal Relationship Between Onchocerciasis and Epilepsy. *Open Forum Infect Dis*. 2020; 7(6):ofaa206. Epub 2020/06/27. <https://doi.org/10.1093/ofid/ofaa206> PMID: 32587878; PubMed Central PMCID: PMC7304933.
10. Bhwana D, Mmbando BP, Dekker MC, Mnacho M, Kakorozya A, Matuja W, et al. Clinical presentation of epilepsy in six villages in an onchocerciasis endemic area in Mahenge, Tanzania. *Epileptic Disord*. 2019; 21(5):425–35. Epub 2019/10/28. <https://doi.org/10.1684/epd.2019.1093> PMID: 31649005.
11. Abd-Elfarg G, Carter JY, Raimon S, Sebit W, Suliman A, Fodjo JNS, et al. Persons with onchocerciasis-associated epilepsy and nodding seizures have a more severe form of epilepsy with more cognitive impairment and higher levels of *Onchocerca volvulus* infection. *Epileptic Disord*. 2020; 22(3):301–8. Epub 2020/06/17. <https://doi.org/10.1684/epd.2020.1164> PMID: 32540799.
12. Hotterbeekx A, Dusabimana A, Mandro M, Abhafule GM, Deogratias W, Siewe Fodjo JN, et al. Urinary N-acetyltyramine-O-beta-glucuronide in Persons with Onchocerciasis-Associated Epilepsy. *Pathogens*. 2020; 9(3). Epub 2020/03/11. <https://doi.org/10.3390/pathogens9030191> PMID: 32151038; PubMed Central PMCID: PMC7157704.
13. Idro R OR, Anguzu R, Akun P, Ningwa A, Abbo C. Doxycycline for the treatment of nodding syndrome: a phase II, randomised placebo-controlled trial Published online August 16, 2023. *Lancet Global Health*. <https://doi.org/10.2139/ssrn.4540290>
14. Van Cutsem G, Siewe Fodjo JN, Dekker MCJ, Amaral LJ, Njamnshi AK, Colebunders R. Case definitions for onchocerciasis-associated epilepsy and nodding syndrome: A focused review. *Seizure*. 2023; 107:132–5. Epub 20230331. <https://doi.org/10.1016/j.seizure.2023.03.024> PMID: 37023626.
15. Monteiro L, Nunes B, Mendonca D, Lopes J. Spectrum of epilepsy in neurocysticercosis: a long-term follow-up of 143 patients. *Acta Neurol Scand*. 1995; 92(1):33–40. <https://doi.org/10.1111/j.1600-0404.1995.tb00463.x> PMID: 7572058.
16. Herrick JA, Bustos JA, Clapham P, Garcia HH, Loeb JA, Cysticercosis Working Group in P. Unique Characteristics of Epilepsy Development in Neurocysticercosis. *Am J Trop Med Hyg*. 2020; 103(2):639–45. Epub 20200514. <https://doi.org/10.4269/ajtmh.19-0485> PMID: 32431269; PubMed Central PMCID: PMC7410468.
17. World Health Organisation. Intersectoral global action plan on epilepsy and other neurological disorders 2022–2031 file:///C:/Users/rcolebun/Downloads/9789240076624-eng.pdf. Available from: file:///C:/Users/rcolebun/Downloads/9789240076624-eng.pdf. Accessed 8 November 2023.
